# Supplementary material for: Astrocytic APOE4 removal confers cerebrovascular protection despite increased cerebral amyloid angiopathy
Source: PubMed Central journal article supplement (PMC10018855; doi:10.1186/s13024-023-00610-x), 2023-03-16

Figure S4

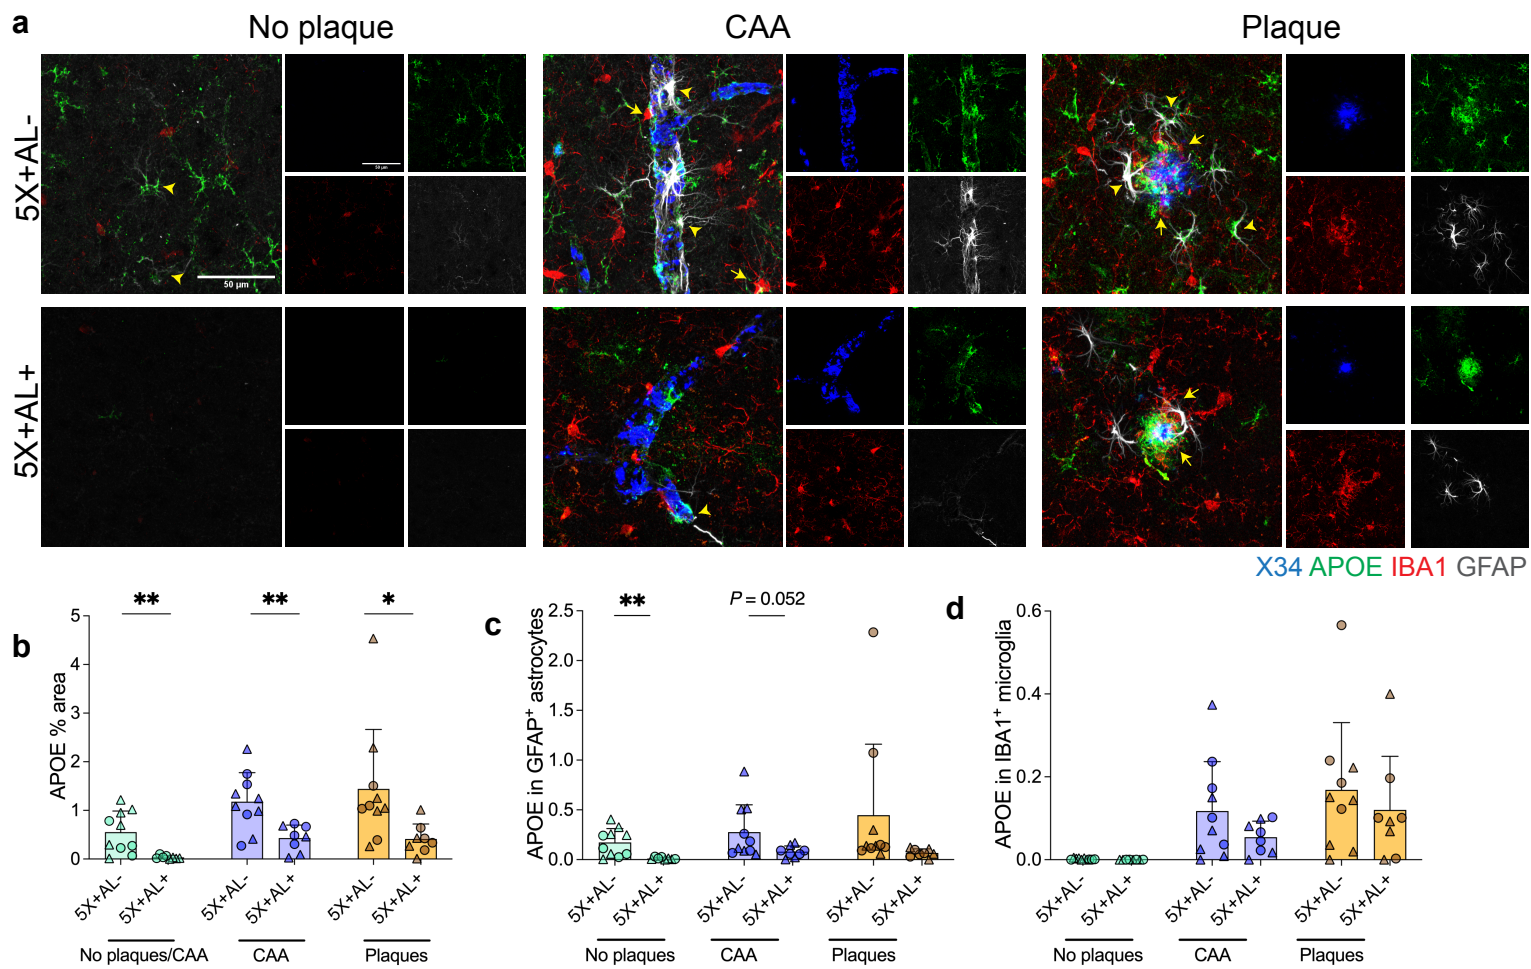

Supplement: 13024_2023_610_MOESM4_ESM.pdf [file 13024_2023_610_MOESM4_ESM.pdf]
